# Supplementary material for: Rapid targeted somatic mutation analysis of solid tumors in routine clinical diagnostics
Source: PubMed Central journal article supplement (PMC4741554; doi:10.18632/oncotarget.5190), 2015-09-02
Supplement: oncotarget-06-30592-s001.pdf [file oncotarget-06-30592-s001.pdf]

## SUPPLEMENTARY TABLE

Supplementary Table S1: *BRAF*, *KRAS*, *NRAS*, *EGFR* and *PIK3CA* primer sequences and PCR reaction conditions.

| GENE           | PRIMER SEQUENCE                                                          | PCR PROGRAM                                                                     |
|----------------|--------------------------------------------------------------------------|---------------------------------------------------------------------------------|
| KRAS EXON 2    | FOR – GGTGGAGTATTTGATAGTGTATTAACC<br>REV – TCATGAAAATGGTCAGAGAAAACC      | 96°C 2 min<br>45 cycles 96°C 30 sec<br>58°C 30 sec<br>72°C 30 sec               |
| KRAS EXON 3    | FOR – TGCACTGTAATAATCCAGACTGTG<br>REV – TGCATGGCATTAGCAAAGAC             | 72°C 7 min                                                                      |
| KRAS EXON 4    | FOR – GATATTTGTGTTACTAATGACTGTGCT<br>REV – CCTCTCAAGAGACAAAAACATTTAC     |                                                                                 |
| NRAS EXON 2    | FOR – AGAACCAAATGGAAGGTCACA<br>REV – CCGACAAGTGAGAGAGACAGGA              | 96°C 2 min<br>45 cycles 96°C 30 sec<br>58°C 30 sec<br>72°C 30 sec               |
| NRAS EXON 3    | FOR – TAGCATTGCATTCCCTGTGG<br>REV – CAGAGAAAATAATGCTCCTAGTACCTG          | 72°C 7 min                                                                      |
| NRAS EXON 4    | FOR – GCGAGTAAAAGACTCGGATGA<br>REV – TGAATATGGATCACATCTCTACCA            |                                                                                 |
| BRAF EXON 15   | FOR – TGCTTGCTCTGATAGGAAAATG<br>REV – TGATTTTTGTGAATACTGGGAAC            | 96°C 2 min<br>45 cycles 96°C 30 sec<br>58°C 30 sec<br>72°C 30 sec<br>72°C 7 min |
| EGFR EXON 18   | FOR – AGGGCTGAGGTGACCCTTGT<br>REV – TCCCCACCAGACCATGAGAG                 | 96°C 2 min<br>10 cycles 96°C 30 sec<br>65°C–55°C* 30 sec<br>72°C 30 sec         |
| EGFR EXON 20   | FOR – ATCGCATTCATGCGTCTTCA<br>REV – ATCCCCATGGCAAACCTTTG                 | 35 cycles 96°C 30 sec<br>58°C 30 sec<br>72°C 30 sec                             |
| EGFR EXON 21   | FOR – GCTCAGAGCCTGGCATGAA<br>REV – CATCCTCCCCTGCATGTGT                   | 72°C 7 min                                                                      |
| PIK3CA EXON 9  | FOR – AAATTTATTGAAAATGTATTTGCTTTTTTC<br>REV – TCCATTTTAGCACTTACCTGTGACTC | 96°C 2 min<br>45 cycles 96°C 30 sec<br>55°C 30 sec<br>72°C 30 sec               |
| PIK3CA EXON 20 | FOR – ATGCCAGAACTACAATCTTTTGATGAC<br>REV – GCTTTCATTTTCTCAGTTATCTTTTCAGT | 72°C 7 min                                                                      |

\*Touchdown: –1°C each cycle
